# Supplementary material
Source: publisher site journal article supplement (https://www.dovepress.com/article/448600)
Supplement: Supplementary file 1 [file get_supplementary_file.php]

# Supplementary Material

[Figure S1. Distribution of (a) hospitals in the nine regions of England; and (b) income deprivation quintiles. 2](#_Toc162515833)

[Table S1. Percentage of patients within 10km threshold 3](#_Toc162515834)

[Figure S2. Distance between patient and hospital addresses (‘patient-to-hospital’). Red vertical line represents 10km threshold. 3](#_Toc162515835)

[Table S2. STROBE checklist. 4](#_Toc162515836)

[Table S3. Descriptive statistics of daily average NO2, temperature and relative humidity across patients. 8](#_Toc162515837)

[Figure S3. Yearly time-series plot of daily mean NO2 concentrations averaged across all patients exposures. 9](#_Toc162515838)

[Table S4. Sensitivity analysis: association of emergency hospital admission for asthma with daily lag exposure to NO2, using only patients within the 10-kilometres patient-to-hospital distance. Odds ratios are per 10 µg/m3 change in NO2. 9](#_Toc162515839)

[Table S5. Association of asthma-related emergency hospital admission with different lag exposure to NO2; overall and by age group (years) and sex. Odds ratios are per 10 µg/m3 change in NO2. 11](#_Toc162515840)

[Table S6. Association of asthma-related emergency hospital admission with different lag exposure to NO2 by season and income deprivation quintile (IMD). Odds ratios are 10 µg/m3 change in NO2. Warm season: April to September; cold season: October to March. IMD = indices of multiple deprivation (income), with IMD1 (quintile 1) being the least deprived and IMD5 (quintile 5) being the most deprived. 12](#_Toc162515841)

[Table S7. Association of asthma-related emergency hospital admission with different lag exposure to NO2 by region. Odds ratios are per 10 µg/m3 change in NO2. 14](#_Toc162515842)

## Figure S1. Distribution of (a) hospitals in the nine regions of England; and (b) income deprivation quintiles.


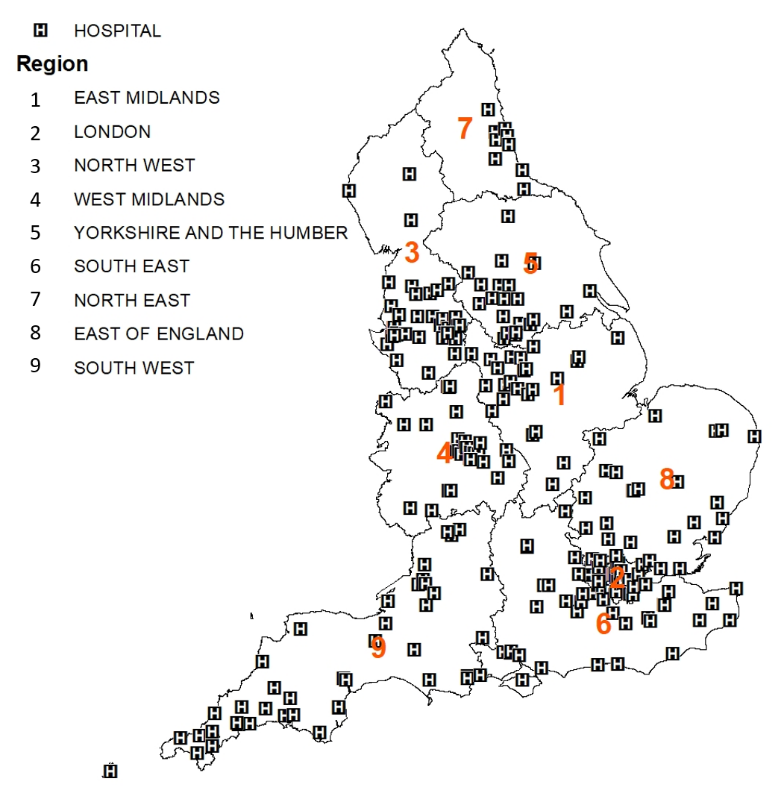


1. Hospitals and regions of England.


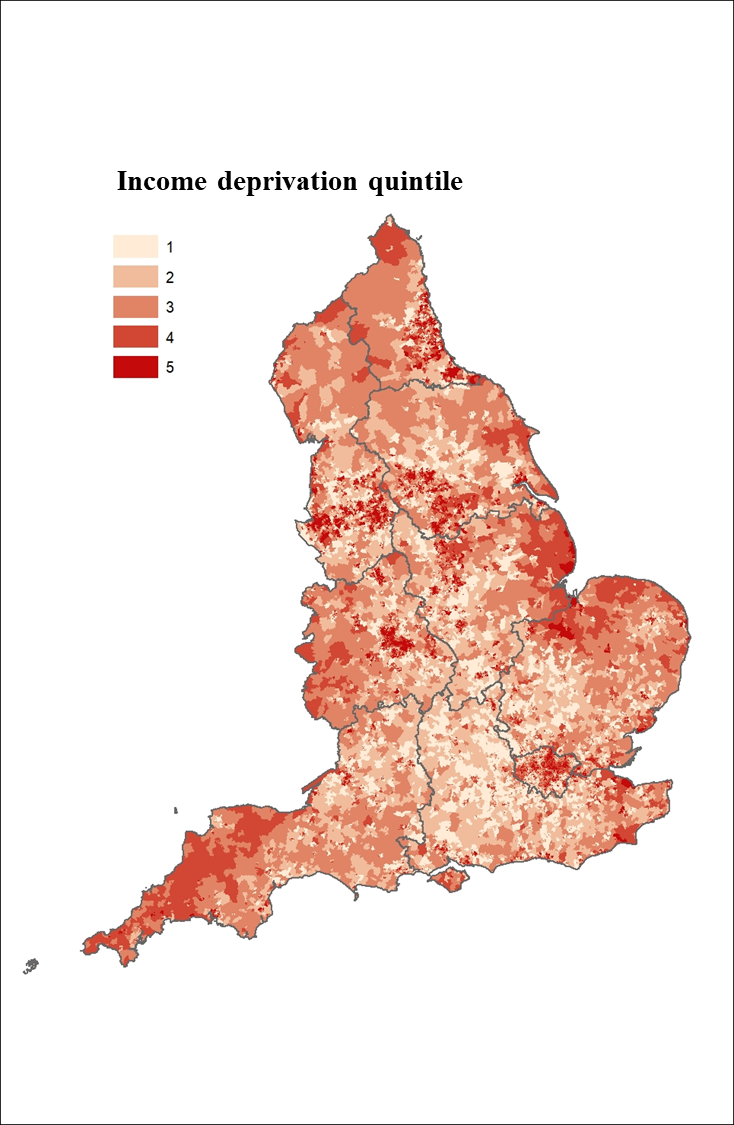


1. Colour-coded income deprivation quintile by Lower Layer Super Output Area (LSOA). With quintile 1 being the least deprived, and quintile 5 being the most deprived.

## Table S1. Percentage of patients within 10km threshold

|  | **%Patients within 10km ‘patient-to-hospital’ threshold** |
| --- | --- |
| Overall | 73 |
| **Season** |  |
| Warm season | 72 |
| Cold season | 74 |
| **Month** |  |
| Jan | 75 |
| Feb | 74 |
| Mar | 74 |
| Apr | 72 |
| May | 73 |
| Jun | 74 |
| Jul | 72 |
| Aug | 68 |
| Sep | 74 |
| Oct | 74 |
| Nov | 73 |
| Dec | 72 |


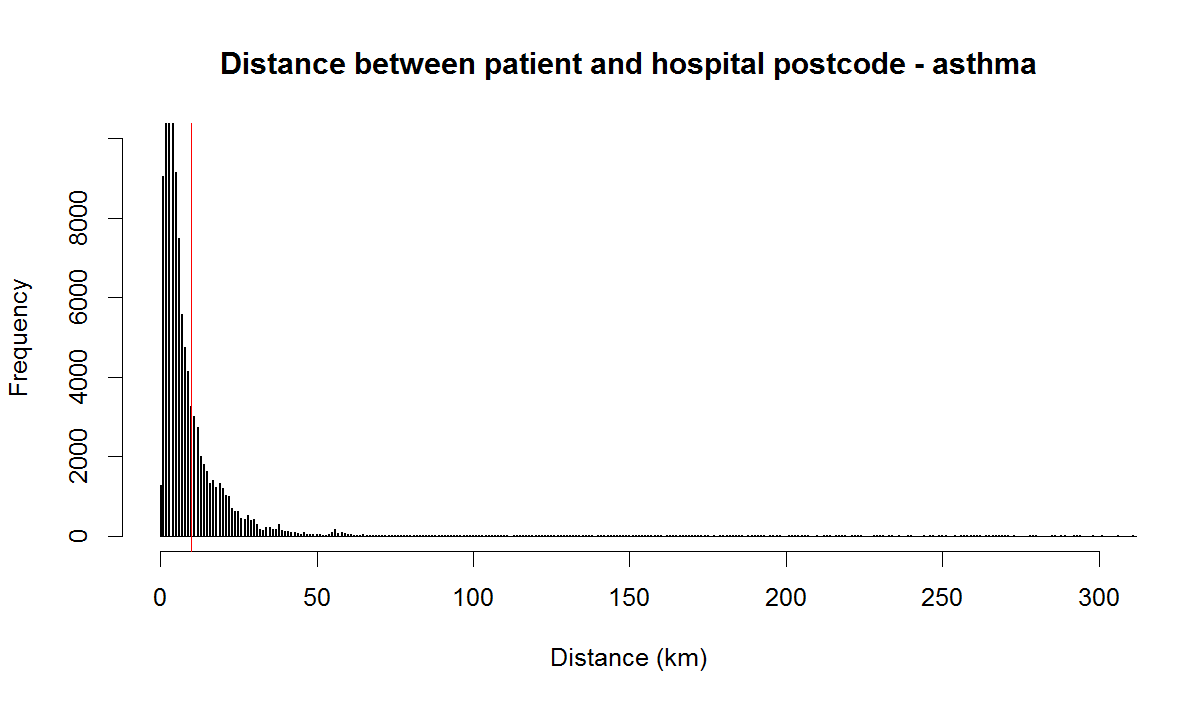


## Figure S2. Distance between patient and hospital addresses (‘patient-to-hospital’). Red vertical line represents 10km threshold.

## Table S2. STROBE checklist.

|  | Item No. | Recommendation | Page  No. | Relevant text from manuscript |
| --- | --- | --- | --- | --- |
| **Title and abstract** | 1 | (*a*) Indicate the study’s design with a commonly used term in the title or the abstract | 1 | Title, Abstract (“case-crossover”) |
| (*b*) Provide in the abstract an informative and balanced summary of what was done and what was found | 1 | Abstract |
| Introduction | | | |  |
| Background/rationale | 2 | Explain the scientific background and rationale for the investigation being reported | 5 | Introduction |
| Objectives | 3 | State specific objectives, including any prespecified hypotheses | 5 | Introduction |
| Methods | | | |  |
| Study design | 4 | Present key elements of study design early in the paper | 6 | Materials and methods |
| Setting | 5 | Describe the setting, locations, and relevant dates, including periods of recruitment, exposure, follow-up, and data collection | 6 | Materials and methods |
| Participants | 6 | (*a*) *Cohort study*—Give the eligibility criteria, and the sources and methods of selection of participants. Describe methods of follow-up  *Case-control study*—Give the eligibility criteria, and the sources and methods of case ascertainment and control selection. Give the rationale for the choice of cases and controls  *Cross-sectional study*—Give the eligibility criteria, and the sources and methods of selection of participants | 6,8 | Materials and methods – Study population and comes/Statistical analysis |
| (*b*)*Cohort study*—For matched studies, give matching criteria and number of exposed and unexposed  *Case-control study*—For matched studies, give matching criteria and the number of controls per case | 8 | Materials and methods – Statistical analysis |
| Variables | 7 | Clearly define all outcomes, exposures, predictors, potential confounders, and effect modifiers. Give diagnostic criteria, if applicable | 6 | Materials and methods |
| Data sources/ measurement | 8* | For each variable of interest, give sources of data and details of methods of assessment (measurement). Describe comparability of assessment methods if there is more than one group | 6 | Materials and methods |
| Bias | 9 | Describe any efforts to address potential sources of bias | 8 | Materials and methods – Statistical analysis |
| Study size | 10 | Explain how the study size was arrived at | 6,10, Supplementary | Materials and methods – Study population and outcome, Results, Figure S3 |

| Quantitative variables | 11 | Explain how quantitative variables were handled in the analyses. If applicable, describe which groupings were chosen and why | 6 | Materials and methods |
| --- | --- | --- | --- | --- |
| Statistical methods | 12 | (*a*) Describe all statistical methods, including those used to control for confounding | 6 | Materials and methods |
| (*b*) Describe any methods used to examine subgroups and interactions | 8 | Materials and methods – Statistical analysis |
| (*c*) Explain how missing data were addressed | 10 | Results (cases with missing sex or postcode were removed) |
| (*d*) *Cohort study*—If applicable, explain how loss to follow-up was addressed  *Case-control study*—If applicable, explain how matching of cases and controls was addressed  *Cross-sectional study*—If applicable, describe analytical methods taking account of sampling strategy | 8 | Materials and methods – Statistical analysis |
| (*e*) Describe any sensitivity analyses | 8 | Materials and methods – Statistical analysis |
| Results | | | | |
| Participants | 13* | (a) Report numbers of individuals at each stage of study—eg numbers potentially eligible, examined for eligibility, confirmed eligible, included in the study, completing follow-up, and analysed | 6,10, Supplementary | Materials and methods – Study population and outcome, Results, Figure S3 |
| (b) Give reasons for non-participation at each stage | 6,10, Supplementary | Materials and methods – Study population and outcome, Results, Figure S3 |
| (c) Consider use of a flow diagram | Supplementary | Figure S3 |
| Descriptive data | 14* | (a) Give characteristics of study participants (eg demographic, clinical, social) and information on exposures and potential confounders | 10,  Supplementary | Results, Table 1, Table S2 |
| (b) Indicate number of participants with missing data for each variable of interest | N/A | Exposure and confounder data do not have missing data |
| (c) *Cohort study*—Summarise follow-up time (eg, average and total amount) | N/A | Case-crossover study |
| Outcome data | 15* | *Cohort study*—Report numbers of outcome events or summary measures over time | N/A | Case-crossover study |
| *Case-control study—*Report numbers in each exposure category, or summary measures of exposure | N/A | Case-crossover study |
| *Cross-sectional study—*Report numbers of outcome events or summary measures | N/A | Case-crossover study |
| Main results | 16 | (*a*) Give unadjusted estimates and, if applicable, confounder-adjusted estimates and their precision (eg, 95% confidence interval). Make clear which confounders were adjusted for and why they were included | 10 | Results, Figure 2 |
| (*b*) Report category boundaries when continuous variables were categorized | 10 | Results |
| (*c*) If relevant, consider translating estimates of relative risk into absolute risk for a meaningful time period | N/A | N/A |

| Other analyses | 17 | Report other analyses done—eg analyses of subgroups and interactions, and sensitivity analyses | 10, Supplementary | Results, Table S3, Figure S5-S8 |
| --- | --- | --- | --- | --- |
| Discussion | | | | |
| Key results | 18 | Summarise key results with reference to study objectives | 17 | Discussion |
| Limitations | 19 | Discuss limitations of the study, taking into account sources of potential bias or imprecision. Discuss both direction and magnitude of any potential bias | 21 | Discussion – Strengths and limitations |
| Interpretation | 20 | Give a cautious overall interpretation of results considering objectives, limitations, multiplicity of analyses, results from similar studies, and other relevant evidence | 17 | Discussion |
| Generalisability | 21 | Discuss the generalisability (external validity) of the study results | N/A | N/A |
| Other information | |  | | |
| Funding | 22 | Give the source of funding and the role of the funders for the present study and, if applicable, for the original study on which the present article is based | 24 | Funding |

*Give information separately for cases and controls in case-control studies and, if applicable, for exposed and unexposed groups in cohort and cross-sectional studies.

**Note:** An Explanation and Elaboration article discusses each checklist item and gives methodological background and published examples of transparent reporting. The STROBE checklist is best used in conjunction with this article (freely available on the Web sites of PLoS Medicine at http://www.plosmedicine.org/, Annals of Internal Medicine at http://www.annals.org/, and Epidemiology at http://www.epidem.com/). Information on the STROBE Initiative is available at www.strobe-statement.org.

## Table S3. Descriptive statistics of daily average NO­2­, temperature and relative humidity across patients.

| **Variable** | **Median** | **Mean** | **IQR** |
| --- | --- | --- | --- |
| **NO2 (µg/m3)*** |  |  |  |
| **All** | 17.1 | 19.0 | 12.6-26.5 |
| **Season** |  |  |  |
| Warm season | 15.5 | 17.4 | 11.0-22.8 |
| Cold season | 17.6 | 19.6 | 14.4-29.7 |
| **Region** |  |  |  |
| South West | 11.7 | 13.0 | 8.2-16.2 |
| Yorkshire and the Humber | 15.6 | 16.6 | 11.9-20.4 |
| East Midlands | 14.5 | 15.9 | 11.1-19.5 |
| London | 28.7 | 29.5 | 23.4-35.0 |
| North West | 18.6 | 19.7 | 14.5-23.9 |
| West Midlands | 17.0 | 17.8 | 12.9-21.8 |
| East of England | 13.9 | 14.9 | 10.6-18.0 |
| South East | 13.6 | 14.6 | 10.4-18.0 |
| North East | 13.8 | 15.0 | 10.2-18.5 |
| **Income deprivation quintile** |  |  |  |
| 1 (least deprived) | 13.6 | 15.3 | 9.5-19.3 |
| 2 | 14.3 | 16.5 | 9.6-20.9 |
| 3 | 15.3 | 17.5 | 9.9-22.6 |
| 4 | 18.2 | 20.6 | 11.9-26.6 |
| 5 (most deprived) | 18.9 | 21.2 | 13.1-27.1 |
| **Daily mean temperature (°C)†** |  |  |  |
| All | 10.1 | 9.8 | 6.7-12.8 |
| Warm season | 12.4 | 12.3 | 10.2-14.5 |
| Cold season | 7.2 | 7.2 | 4.6-10.1 |
| **Daily mean relative humidity (%)†** |  |  |  |
| All | 82.3 | 81.8 | 75.9-88.2 |
| Warm season | 79.0 | 78.8 | 72.7-85.0 |
| Cold season | 85.2 | 84.8 | 79.8-90.4 |
| *Descriptive statistics of NO2 is based on daily data for patient cases with less than or equal to 10-km ‘patient-to-hospital’ distance | | | |
| †Descriptive statistics of daily weather (temperature and relative humidity) data at patient residential postcode | | | |

## Figure S3. Yearly time-series plot of daily mean NO2 concentrations averaged across all patients exposures.


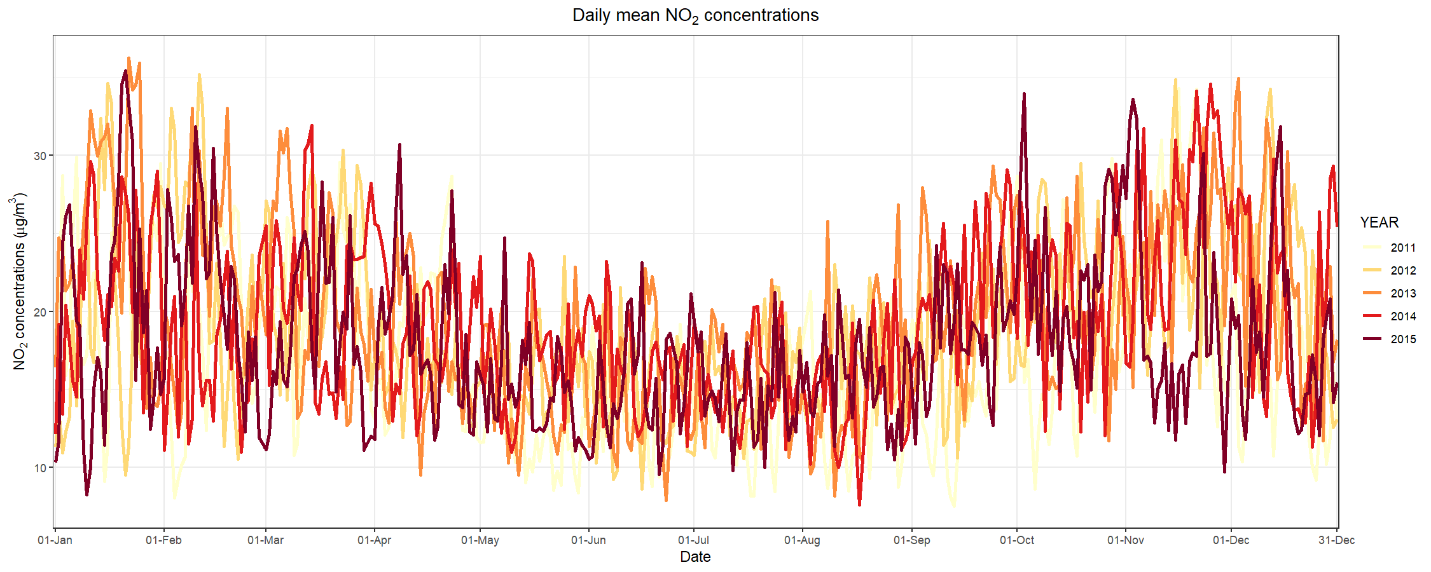


## Table S4. Sensitivity analysis: association of emergency hospital admission for asthma with daily lag exposure to NO2, using only patients within the 10-kilometres patient-to-hospital distance. Odds ratios are per 10 µg/m3 change in NO2.

| **Category** | | **OR (95%CI)** | ***P*-value** |
| --- | --- | --- | --- |
| **All** | | **1.083 (1.063, 1.105)** | **0.000** |
| **Age group (years)** | 0–4 | **1.078 (1.046, 1.110)** | **0.000** |
| 5–9 | **1.095 (1.061, 1.130)** | **0.000** |
| 10–14 | **1.072 (1.026, 1.120)** | **0.001** |
| **Sex** | Male | **1.101 (1.074, 1.128)** | **0.000** |
| Female | **1.055 (1.021, 1.089)** | **0.001** |
| **Season** | Warm | 1.070 (0.994, 1.153) | 0.070 |
| Cold | **1.082 (1.018, 1.151)** | **0.011** |
| **Income deprivation quintile** | 1 (least deprived) | **1.106 (1.048, 1.167)** | **0.000** |
| 2 | **1.084 (1.043, 1.127)** | **0.000** |
| 3 | **1.080 (1.049, 1.112)** | **0.000** |
| 4 | **1.127 (1.013, 1.254)** | **0.027** |
| 5 (most deprived) | **1.105 (1.060, 1.152)** | **0.000** |
| **Region** | South West | **1.099 (1.074, 1.125)** | **0.000** |
| Yorkshire and the Humber | 1.002 (0.915, 1.098) | 0.953 |
| East Midlands | **1.075 (1.035, 1.116)** | **0.000** |
| London | **1.059 (1.008, 1.112)** | **0.020** |
| North West | **1.131 (1.057, 1.209)** | **0.000** |
| West Midlands | 1.058 (0.988, 1.132) | 0.105 |
| East of England | **0.937 (0.901, 0.975)** | **0.000** |
| South East | 1.062 (0.974, 1.158) | 0.171 |
| North East | **1.168 (1.074, 1.271)** | **0.000** |

Values in bold indicate statistical significance with p-value < 0.05

## Table S5. Association of asthma-related emergency hospital admission with different lag exposure to NO2; overall and by age group (years) and sex. Odds ratios are per 10 µg/m3 change in NO2.

| **Category** | | **Lag** | **OR (95% CI)** | ***P*-value** |
| --- | --- | --- | --- | --- |
| **All** |  | 0 | **1.030 (1.008, 1.018)** | **0.000** |
|  |  | 1 | **1.042 (1.013, 1.023)** | **0.000** |
|  |  | 2 | **1.040 (1.012, 1.022)** | **0.000** |
|  |  | 3 | **1.038 (1.011, 1.021)** | **0.000** |
|  |  | 4 | **1.047 (1.015, 1.025)** | **0.000** |
|  |  | 0-4 | **1.082 (1.027, 1.043)** | **0.000** |
| **Age groups (years)** | 0–4 | 0 | **1.035 (1.007, 1.023)** | **0.000** |
|  |  | 1 | **1.054 (1.015, 1.031)** | **0.000** |
|  |  | 2 | **1.033 (1.007, 1.022)** | **0.000** |
|  |  | 3 | **1.043 (1.010, 1.026)** | **0.000** |
|  |  | 4 | **1.047 (1.013, 1.028)** | **0.000** |
|  |  | 0-4 | **1.089 (1.026, 1.050)** | **0.000** |
|  | 5–9 | 0 | **1.029 (1.004, 1.021)** | **0.003** |
|  |  | 1 | **1.034 (1.006, 1.023)** | **0.001** |
|  |  | 2 | **1.047 (1.012, 1.029)** | **0.000** |
|  |  | 3 | **1.027 (1.004, 1.020)** | **0.005** |
|  |  | 4 | **1.048 (1.012, 1.029)** | **0.000** |
|  |  | 0-4 | **1.077 (1.020, 1.045)** | **0.000** |
|  | 10–14 | 0 | 1.022 (0.998, 1.021) | 0.103 |
|  |  | 1 | **1.031 (1.002, 1.025)** | **0.021** |
|  |  | 2 | **1.038 (1.005, 1.028)** | **0.005** |
|  |  | 3 | **1.045 (1.008, 1.031)** | **0.001** |
|  |  | 4 | **1.045 (1.008, 1.031)** | **0.001** |
|  |  | 0-4 | **1.075 (1.015, 1.049)** | **0.000** |
| **Sex** | Male | 0 | **1.032 (1.007, 1.020)** | **0.000** |
|  |  | 1 | **1.050 (1.015, 1.028)** | **0.000** |
|  |  | 2 | **1.047 (1.014, 1.027)** | **0.000** |
|  |  | 3 | **1.041 (1.011, 1.024)** | **0.000** |
|  |  | 4 | **1.056 (1.018, 1.031)** | **0.000** |
|  |  | 0-4 | **1.096 (1.031, 1.050)** | **0.000** |
|  | Female | 0 | **1.027 (1.003, 1.020)** | **0.006** |
|  |  | 1 | **1.029 (1.004, 1.021)** | **0.004** |
|  |  | 2 | **1.028 (1.004, 1.020)** | **0.005** |
|  |  | 3 | **1.032 (1.006, 1.022)** | **0.001** |
|  |  | 4 | **1.032 (1.005, 1.022)** | **0.001** |
|  |  | 0-4 | **1.060 (1.013, 1.038)** | **0.000** |

Values in bold indicate statistical significance with p-value < 0.05

## Table S6. Association of asthma-related emergency hospital admission with different lag exposure to NO2 by season and income deprivation quintile (IMD). Odds ratios are 10 µg/m3 change in NO2. Warm season: April to September; cold season: October to March. IMD = indices of multiple deprivation (income), with IMD1 (quintile 1) being the least deprived and IMD5 (quintile 5) being the most deprived.

| **Category** | | **Lag** | **OR (95% CI)** | ***P*-value** |
| --- | --- | --- | --- | --- |
| **Season** | Warm | 0 | **0.953 (0.970, 0.989)** | **0.000** |
|  |  | 1 | 0.979 (0.981, 1.000) | 0.059 |
|  |  | 2 | **0.966 (0.976, 0.994)** | **0.002** |
|  |  | 3 | **0.956 (0.971, 0.990)** | **0.000** |
|  |  | 4 | 0.992 (0.988, 1.006) | 0.483 |
|  |  | 0-4 | **0.933 (0.956, 0.985)** | **0.000** |
|  | Cold | 0 | **1.049 (1.015, 1.027)** | **0.000** |
|  |  | 1 | **1.051 (1.016, 1.028)** | **0.000** |
|  |  | 2 | **1.052 (1.016, 1.029)** | **0.000** |
|  |  | 3 | **1.053 (1.017, 1.029)** | **0.000** |
|  |  | 4 | **1.052 (1.016, 1.029)** | **0.000** |
|  |  | 0-4 | **1.101 (1.034, 1.052)** | **0.000** |
| **Income deprivation quintile** | 1 (least deprived) | 0 | 1.005 (0.986, 1.019) | 0.788 |
|  |  | 1 | 0.998 (0.982, 1.016) | 0.902 |
|  |  | 2 | 1.017 (0.991, 1.024) | 0.394 |
|  |  | 3 | 1.025 (0.994, 1.027) | 0.203 |
|  |  | 4 | **1.051 (1.005, 1.039)** | **0.010** |
|  |  | 0-4 | 1.038 (0.992, 1.041) | 0.185 |
|  | 2 | 0 | **1.047 (1.005, 1.035)** | **0.008** |
|  |  | 1 | **1.035 (1.000, 1.030)** | **0.045** |
|  |  | 2 | **1.053 (1.008, 1.037)** | **0.002** |
|  |  | 3 | 1.024 (0.996, 1.025) | 0.166 |
|  |  | 4 | **1.037 (1.002, 1.031)** | **0.030** |
|  |  | 0-4 | **1.081 (1.013, 1.056)** | **0.001** |
|  | 3 | 0 | **1.046 (1.007, 1.033)** | **0.003** |
|  |  | 1 | **1.055 (1.010, 1.037)** | **0.001** |
|  |  | 2 | **1.064 (1.014, 1.041)** | **0.000** |
|  |  | 3 | **1.047 (1.007, 1.034)** | **0.002** |
|  |  | 4 | **1.059 (1.012, 1.039)** | **0.000** |
|  |  | 0-4 | **1.113 (1.028, 1.068)** | **0.000** |
|  | 4 | 0 | **1.028 (1.002, 1.023)** | **0.022** |
|  |  | 1 | **1.052 (1.012, 1.033)** | **0.000** |
|  |  | 2 | **1.026 (1.001, 1.022)** | **0.033** |
|  |  | 3 | **1.030 (1.002, 1.023)** | **0.015** |
|  |  | 4 | **1.037 (1.006, 1.026)** | **0.002** |
|  |  | 0-4 | **1.072 (1.015, 1.046)** | **0.000** |
|  | 5 (most deprived) | 0 | **1.027 (1.003, 1.020)** | **0.006** |
|  |  | 1 | **1.044 (1.010, 1.027)** | **0.000** |
|  |  | 2 | **1.041 (1.009, 1.026)** | **0.000** |
|  |  | 3 | **1.047 (1.012, 1.028)** | **0.000** |
|  |  | 4 | **1.051 (1.014, 1.030)** | **0.000** |
|  |  | 0-4 | **1.089 (1.025, 1.050)** | **0.000** |

Values in bold indicate statistical significance with p-value < 0.05

## Table S7. Association of asthma-related emergency hospital admission with different lag exposure to NO2 by region. Odds ratios are per 10 µg/m3 change in NO2.

| **Category** | | **Lag** | **OR (95% CI)** | ***P*-value** |
| --- | --- | --- | --- | --- |
| **Region** | East Midlands | 0 | 1.040 (0.992, 1.042) | 0.179 |
|  |  | 1 | **1.098 (1.017, 1.067)** | **0.001** |
|  |  | 2 | 1.042 (0.994, 1.043) | 0.149 |
|  |  | 3 | 1.053 (0.999, 1.048) | 0.066 |
|  |  | 4 | 1.047 (0.996, 1.045) | 0.101 |
|  |  | 0-4 | **1.114 (1.011, 1.086)** | **0.010** |
|  | London | 0 | **1.040 (1.006, 1.029)** | **0.003** |
|  |  | 1 | **1.039 (1.005, 1.028)** | **0.004** |
|  |  | 2 | **1.038 (1.005, 1.028)** | **0.005** |
|  |  | 3 | **1.034 (1.003, 1.026)** | **0.010** |
|  |  | 4 | **1.047 (1.009, 1.031)** | **0.000** |
|  |  | 0-4 | **1.095 (1.023, 1.058)** | **0.000** |
|  | North West | 0 | **1.030 (1.002, 1.024)** | **0.016** |
|  |  | 1 | **1.055 (1.013, 1.034)** | **0.000** |
|  |  | 2 | **1.033 (1.004, 1.025)** | **0.008** |
|  |  | 3 | **1.037 (1.005, 1.026)** | **0.003** |
|  |  | 4 | **1.051 (1.012, 1.033)** | **0.000** |
|  |  | 0-4 | **1.086 (1.021, 1.052)** | **0.000** |
|  | West Midlands | 0 | 1.007 (0.989, 1.017) | 0.668 |
|  |  | 1 | 1.025 (0.997, 1.025) | 0.136 |
|  |  | 2 | **1.064 (1.013, 1.041)** | **0.000** |
|  |  | 3 | **1.053 (1.009, 1.036)** | **0.001** |
|  |  | 4 | **1.049 (1.008, 1.035)** | **0.002** |
|  |  | 0-4 | **1.077 (1.013, 1.053)** | **0.001** |
|  | Yorkshire and the Humber | 0 | 1.034 (0.996, 1.033) | 0.117 |
|  |  | 1 | 1.035 (0.997, 1.034) | 0.098 |
|  |  | 2 | **1.072 (1.012, 1.049)** | **0.001** |
|  |  | 3 | **1.076 (1.014, 1.051)** | **0.000** |
|  |  | 4 | **1.054 (1.005, 1.041)** | **0.011** |
|  |  | 0-4 | **1.118 (1.022, 1.078)** | **0.000** |
|  | South East | 0 | 1.031 (0.997, 1.030) | 0.112 |
|  |  | 1 | 1.023 (0.994, 1.027) | 0.231 |
|  |  | 2 | 1.025 (0.995, 1.027) | 0.187 |
|  |  | 3 | 1.006 (0.986, 1.019) | 0.770 |
|  |  | 4 | 1.034 (0.999, 1.031) | 0.073 |
|  |  | 0-4 | 1.051 (0.999, 1.045) | 0.066 |
|  | North East | 0 | 1.001 (0.978, 1.023) | 0.973 |
|  |  | 1 | 1.013 (0.983, 1.029) | 0.643 |
|  |  | 2 | 1.010 (0.982, 1.027) | 0.718 |
|  |  | 3 | 0.983 (0.970, 1.015) | 0.506 |
|  |  | 4 | 1.030 (0.990, 1.036) | 0.266 |
|  |  | 0-4 | 1.010 (0.972, 1.038) | 0.786 |
|  | East of England | 0 | 1.043 (0.998, 1.039) | 0.071 |
|  |  | 1 | 1.035 (0.996, 1.035) | 0.131 |
|  |  | 2 | 1.020 (0.989, 1.029) | 0.378 |
|  |  | 3 | 1.021 (0.989, 1.029) | 0.372 |
|  |  | 4 | 1.029 (0.993, 1.032) | 0.213 |
|  |  | 0-4 | 1.061 (0.997, 1.056) | 0.083 |
|  | South West | 0 | **1.054 (1.004, 1.043)** | **0.016** |
|  |  | 1 | **1.072 (1.011, 1.050)** | **0.002** |
|  |  | 2 | **1.051 (1.003, 1.041)** | **0.021** |
|  |  | 3 | **1.068 (1.011, 1.048)** | **0.002** |
|  |  | 4 | **1.069 (1.011, 1.048)** | **0.002** |
|  |  | 0-4 | **1.120 (1.023, 1.078)** | **0.000** |

Values in bold indicate statistical significance with p-value < 0.05
